# Supplementary material for: A Gamified Smartphone-Based Intervention for Depression: Randomized Controlled Pilot Trial
Source: PubMed Central journal article supplement (PMC8335612; doi:10.2196/16643), 2021-07-20

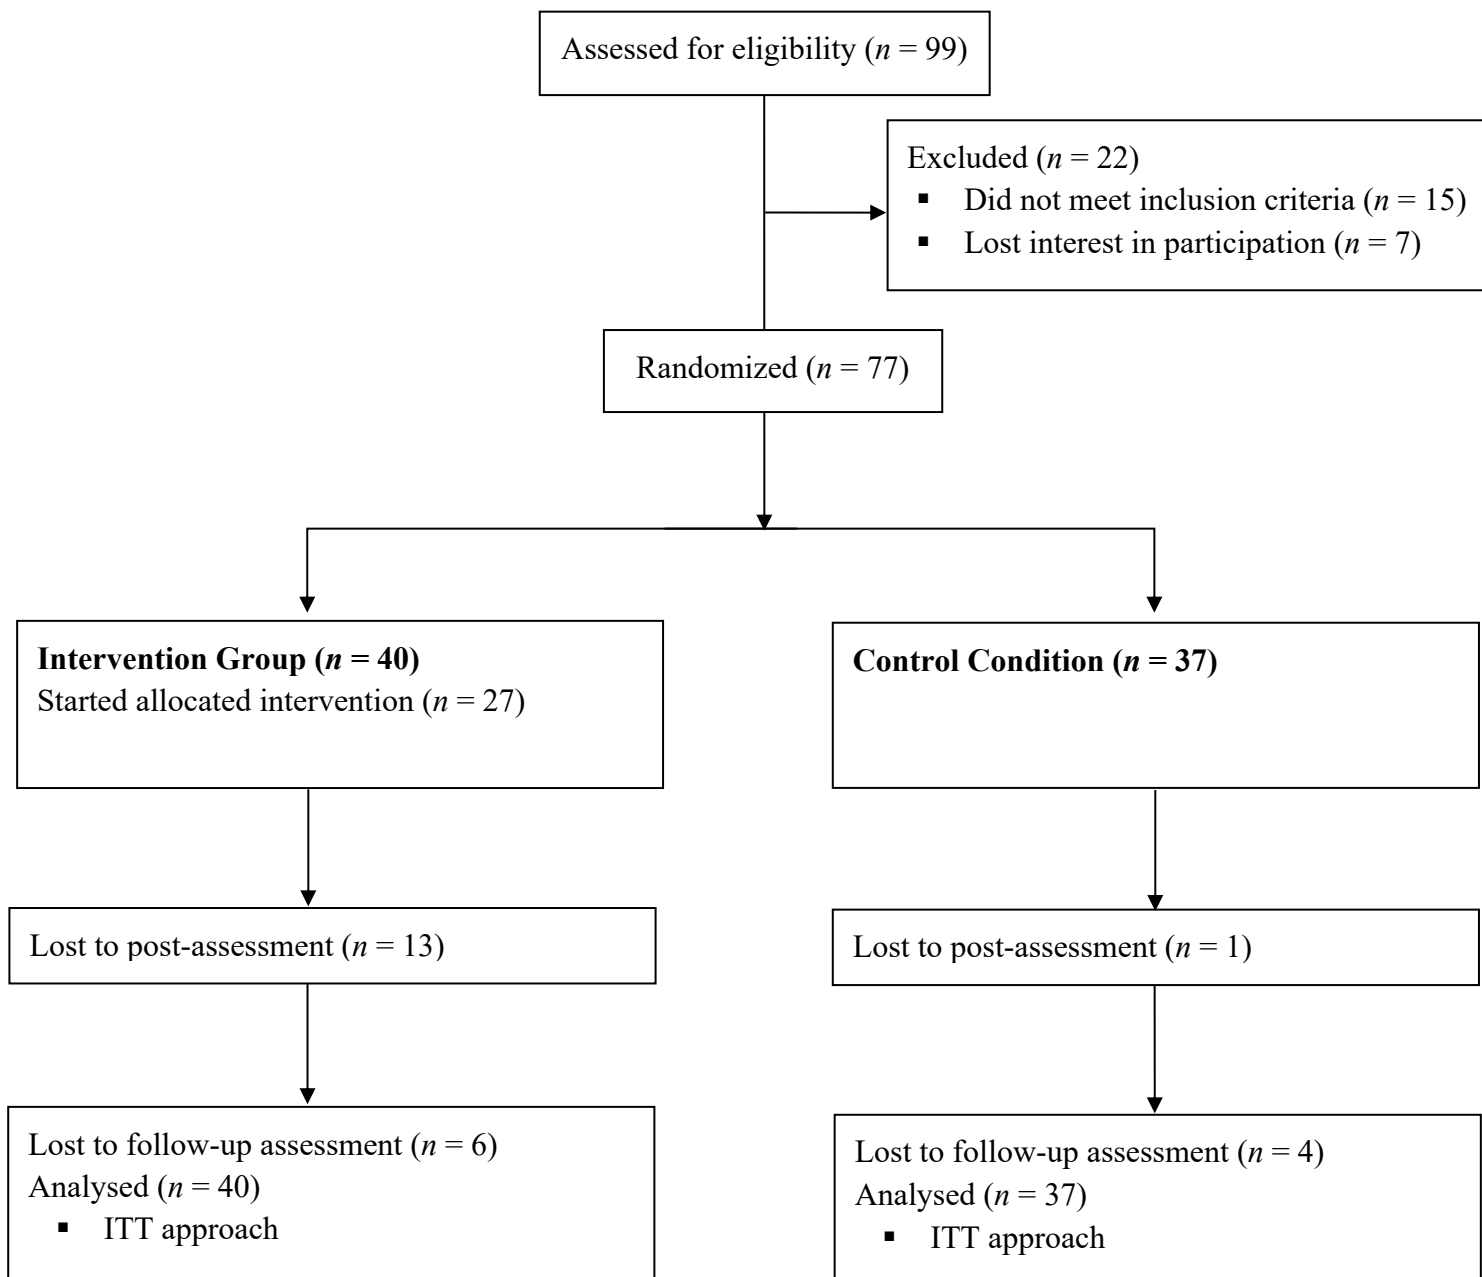

Supplement: mental_v8i7e16643_app3.pdf [file mental_v8i7e16643_app3.pdf]
